# Supplementary material
Source: PubMed Central journal article supplement (PMC4674224)
Supplement: SD2.pdf [file SD2.pdf]

SUPPLEMENTAL APPENDIX 1  
Summary of melioidosis cases in the Americas (1945–2015)

| Case | Patient                        | Year of diagnosis | Country of diagnosis | Travel history including prior residence, vacation, or country of birth                | Country where infection was most likely acquired      | Potential risk of exposure                                                                              | Underlying medical conditions or risk factors | Outcome  | Reference |
|------|--------------------------------|-------------------|----------------------|----------------------------------------------------------------------------------------|-------------------------------------------------------|---------------------------------------------------------------------------------------------------------|-----------------------------------------------|----------|-----------|
| 1    | 31 YO male                     | 1947              | United States        | Panama                                                                                 | Panama                                                | Unknown risk in Panama                                                                                  | None                                          | Survived | 1         |
| 2    | 25 YO female—U.S. Marine Corps | 1948              | United States        | American marine who may have traveled to parts of noncontiguous United States (Hawaii) | Noncontiguous United States (Hawaii)                  | Unknown risk in Hawaii                                                                                  | NR                                            | Died     | 2,3       |
| 3    | 45 YO male                     | 1950              | United States        | No travel history outside the United States                                            | United States (mainland)                              | Unknown risk in the United States                                                                       | Alcoholism                                    | Survived | 4         |
| 4    | 32 YO male                     | 1953              | United States        | American soldier with travel history to the Philippines                                | The Philippines                                       | Unknown risk in the Philippines                                                                         | Unknown                                       | Survived | 5         |
| 5    | 20 YO male                     | 1957              | United States        | Panama                                                                                 | Panama                                                | Unknown risk in Panama                                                                                  | None                                          | Survived | 6         |
| 6    | 30 YO male                     | 1962              | Ecuador              | Resident of Ecuador with no travel history outside Ecuador                             | Ecuador                                               | Farmer with direct contact with soil; patient often walked barefoot in rice field in Ecuador            | None                                          | Died     | 7         |
| 7    | Male infant                    | 1971              | United States        | No travel history outside the United States                                            | United States (mainland)                              | In utero; infant father was a Vietnam veteran                                                           | None                                          | Died     | 8         |
| 8    | 24 YO male                     | 1973              | United States        | Hong Kong, Vietnam, Japan, Mexico, and the Philippines                                 | Hong Kong, Vietnam, Japan, Mexico, or the Philippines | Frequent sexual contact with prostitutes in Vietnam                                                     | None                                          | Survived | 9         |
| 9    | Wife of patient no. 8          | 1973              | United States        | Mexico and Hawaii                                                                      | United States (mainland)                              | Sexual contact with patient no. 8                                                                       | NR                                            | Survived | 9         |
| 10   | 61 YO female                   | 1976              | United States        | Japan, China, Hong Kong, Thailand, Singapore, Indonesia, and Colombia                  | United States (mainland)                              | Unknown risk in SE Asia                                                                                 | None                                          | Died     | 10,11     |
| 11   | 33 YO male                     | 1980              | United States        | No travel history to endemic areas                                                     | United States (mainland)                              | Occupational exposure; patient was a laboratory worker who worked with <i>Burkholderia pseudomallei</i> | None                                          | Survived | 12        |
| 12   | 13 YO male                     | Unknown           | El Salvador          | Resident of El Salvador with unknown travel history                                    | El Salvador                                           | Unknown risk in El Salvador                                                                             | Unknown                                       | Survived | 13        |
| 13   | 88 YO female                   | Unknown           | El Salvador          | Resident of El Salvador with unknown travel history                                    | El Salvador                                           | Unknown risk in El Salvador                                                                             | Unknown                                       | Survived | 13        |
| 14   | 14 YO of unknown gender        | Unknown           | El Salvador          | Resident of El Salvador with unknown travel history                                    | El Salvador                                           | Unknown risk in El Salvador                                                                             | Unknown                                       | Survived | 13        |
| 15   | 18 YO male                     | 1980              | El Salvador          | Resident of El Salvador with unknown travel history                                    | El Salvador                                           | Unknown risk in El Salvador                                                                             | Unknown                                       | Survived | 13        |
| 16   | 13 YO male                     | Unknown           | El Salvador          | Resident of El Salvador with unknown travel history                                    | El Salvador                                           | Unknown risk in El Salvador                                                                             | Unknown                                       | Survived | 13        |
| 17   | 33 YO of unknown gender        | Unknown           | El Salvador          | Resident of El Salvador with unknown travel history                                    | El Salvador                                           | Unknown risk in El Salvador                                                                             | Unknown                                       | Died     | 13        |
| 18   | 66 YO of unknown gender        | Unknown           | El Salvador          | Resident of El Salvador with unknown travel history                                    | El Salvador                                           | Unknown risk in El Salvador                                                                             | Unknown                                       | Survived | 13        |

(continued)

SUPPLEMENTAL APPENDIX 1  
Continued

| Case | Patient                 | Year of diagnosis | Country of diagnosis | Travel history including prior residence, vacation, or country of birth                               | Country where infection was most likely acquired | Potential risk of exposure                                                                                                                                     | Underlying medical conditions or risk factors | Outcome  | Reference |
|------|-------------------------|-------------------|----------------------|-------------------------------------------------------------------------------------------------------|--------------------------------------------------|----------------------------------------------------------------------------------------------------------------------------------------------------------------|-----------------------------------------------|----------|-----------|
| 19   | 18 YO male              | Unknown           | El Salvador          | Resident of El Salvador with unknown travel history                                                   | El Salvador                                      | Unknown risk in El Salvador                                                                                                                                    | Unknown                                       | Died     | 13        |
| 20   | 23 YO male              | Unknown           | El Salvador          | Resident of El Salvador with unknown travel history                                                   | El Salvador                                      | Unknown risk in El Salvador                                                                                                                                    | Unknown                                       | Survived | 13        |
| 21   | 17 YO of unknown gender | Unknown           | El Salvador          | Resident of El Salvador with unknown travel history                                                   | El Salvador                                      | Unknown risk in El Salvador                                                                                                                                    | Hodgkin's disease                             | Survived | 13        |
| 22   | Unknown age and gender  | Unknown           | El Salvador          | Resident of El Salvador with unknown travel history                                                   | El Salvador                                      | Unknown risk in El Salvador                                                                                                                                    | Unknown                                       | Survived | 13        |
| 23   | 14 YO male              | Unknown           | El Salvador          | Resident of El Salvador with unknown travel history                                                   | El Salvador                                      | Unknown risk in El Salvador                                                                                                                                    | Unknown                                       | Survived | 13        |
| 24   | 15 YO of unknown gender | Unknown           | El Salvador          | Resident of El Salvador with unknown travel history                                                   | El Salvador                                      | Unknown risk in El Salvador                                                                                                                                    | Unknown                                       | Died     | 13        |
| 25   | 62 YO female            | 1982              | United States        | Resident of Puerto Rico with no travel history outside Puerto Rico                                    | United States (Puerto Rico)                      | Unknown risk in Puerto Rico                                                                                                                                    | Diabetes, liver disease, and steroid use      | Died     | 14        |
| 26   | 72 YO male              | 1985              | United States        | Resident of Mexico with travel history to the United States for medical care 4 weeks before admission | Mexico                                           | Unknown risk in Mexico                                                                                                                                         | None                                          | Died     | 15        |
| 27   | 66 YO male              | 1994              | France               | Resident of Martinique with travel history to Africa and South America 40 years before diagnosis      | Martinique                                       | Environmental exposure: serological testing from sheep and pigs in the patient's neighborhood (Martinique) revealed <i>B. pseudomallei</i> in 22% of the cases | Diabetes                                      | Survived | 16,17     |
| 28   | 50 YO male              | 1995              | Venezuela            | Resident of Venezuela with no travel history outside Venezuela                                        | Venezuela                                        | Unknown risk in Venezuela                                                                                                                                      | Diabetes                                      | Survived | 18        |
| 29   | 11 YO male              | 1997              | United States        | Resident of Puerto Rico with travel history to United States (mainland) for medical care              | United States (Puerto Rico)                      | Environmental exposure in Puerto Rico: patient resided on a farm in Puerto Rico                                                                                | Chronic granulomatous disease                 | Died     | 19        |
| 30   | 4 YO male               | 1997              | Guadeloupe           | Resident of France with travel history to Guadeloupe                                                  | Guadeloupe                                       | Unknown risk in Guadeloupe                                                                                                                                     | Chronic granulomatous disease                 | Survived | 20,21     |
| 31   | Female of unknown age   | 1998              | France               | Resident of Martinique with no known travel history outside Martinique                                | Martinique                                       | Unknown risk in Martinique                                                                                                                                     | Diabetes                                      | Survived | 17,22     |
| 32   | 60 YO male              | 1998              | Colombia             | Resident of Colombia with no reported travel history                                                  | Colombia                                         | Agriculture: patient was a farmer in Colombia                                                                                                                  | Diabetes                                      | Survived | 23        |
| 33   | 65 YO male              | 1998              | Colombia             | Resident of Colombia with no reported travel history                                                  | Colombia                                         | Agriculture: patient was a farmer in Colombia                                                                                                                  | None                                          | Survived | 23        |
| 34   | Male of unknown age     | 1999              | France               | Resident of Martinique with no known travel history outside Martinique                                | Martinique                                       | Unknown risk in Martinique                                                                                                                                     | Immunocompromised                             | Survived | 17,22     |

(continued)

SUPPLEMENTAL APPENDIX 1  
Continued

| Case | Patient      | Year of diagnosis | Country of diagnosis        | Travel history including prior residence, vacation, or country of birth | Country where infection was most likely acquired | Potential risk of exposure                                                                                             | Underlying medical conditions or risk factors | Outcome  | Reference                 |
|------|--------------|-------------------|-----------------------------|-------------------------------------------------------------------------|--------------------------------------------------|------------------------------------------------------------------------------------------------------------------------|-----------------------------------------------|----------|---------------------------|
| 35   | 63 YO male   | 2000              | Costa Rica                  | Resident of Costa Rica with no travel history outside Costa Rica        | Costa Rica                                       | Contact with animals; patient worked with cattle in Costa Rica                                                         | Diabetes                                      | Died     | 24                        |
| 36   | 50 YO male   | 2000              | Venezuela                   | NR                                                                      | Venezuela                                        | Environmental exposure in Venezuela; patient worked as an electrician in rice plantations                              | Diabetes                                      | Survived | 18                        |
| 37   | 37 YO female | 2000              | United States               | Resident of El Salvador                                                 | El Salvador                                      | Unknown risk in El Salvador                                                                                            | Diabetes                                      | Survived | Unpublished data from CDC |
| 38   | 10 YO female | 2003              | Colombia                    | Resident of Colombia with no reported travel history                    | Colombia                                         | Unknown risk in Colombia; patient was a student                                                                        | None                                          | Died     | 23                        |
| 39   | 40 YO male   | 2006              | Colombia                    | Resident of Colombia with no reported travel history                    | Colombia                                         | Agriculture; patient was a farmer in Colombia                                                                          | Diabetes                                      | Died     | 23                        |
| 40   | 58 YO male   | 2002              | United States               | Indonesia                                                               | Indonesia                                        | Unknown risk in Indonesia                                                                                              | NR                                            | Survived | 25                        |
| 41*  | 15 YO male   | 2003              | Brazil                      | Resident of Brazil with no travel history outside Brazil                | Brazil                                           | Contact with water after rainy season or possible inhalation of soil                                                   | None                                          | Died     | 26-30                     |
| 42*  | 14 YO female | 2003              | Brazil                      | Resident of Brazil with no travel history outside Brazil                | Brazil                                           | Contact with water after rainy season or possible inhalation of soil                                                   | None                                          | Died     | 26-30                     |
| 43*  | 10 YO male   | 2003              | Brazil                      | Resident of Brazil with no travel history outside Brazil                | Brazil                                           | Contact with water after rainy season or possible inhalation of soil                                                   | None                                          | Died     | 23,25-28                  |
| 44*  | 12 YO female | 2003              | Brazil                      | Resident of Brazil with no travel history outside Brazil                | Brazil                                           | Contact with water after rainy season or possible inhalation of soil                                                   | None                                          | Survived | 23,25-28                  |
| 45   | 66 YO male   | 2003              | Portugal                    | Resident of Venezuela                                                   | Venezuela                                        | particulates in Brazil                                                                                                 | Chronic renal insufficiency                   | Survived | 26                        |
| 46   | 55 YO female | 2003              | United States (Puerto Rico) | Puerto Rico resident with travel history to mainland United States      | United States (Puerto Rico)                      | Unknown risk in Venezuela                                                                                              | Diabetes                                      | Died     | 31                        |
| 47   | 47 YO male   | 2003              | United States               | El Salvador                                                             | El Salvador                                      | Risk of exposure to flood water 4 days before illness                                                                  | Diabetes                                      | Died     | 32                        |
| 48   | 50 YO male   | 2003              | The Netherlands             | Brazil and Vietnam                                                      | Brazil                                           | Unknown risk in El Salvador                                                                                            | Diabetes and renal disease                    | Died     | 33                        |
| 49   | 46 YO female | 2004              | Colombia                    | Resident of Colombia with no reported travel history                    | Colombia                                         | Activities in Brazil included hiking through national park; swimming in lake, pools, and sea; and sightseeing in caves | None                                          | Survived | 23                        |
| 50   | 39 YO female | 2004              | Brazil                      | Resident of Brazil with no travel history outside Brazil                | Brazil                                           | Unknown risk in Colombia                                                                                               | Alcoholism                                    | Died     | 26,27                     |

(continued)

SUPPLEMENTAL APPENDIX 1  
Continued

| Case | Patient      | Year of diagnosis | Country of diagnosis     | Travel history including prior residence, vacation, or country of birth              | Country where infection was most likely acquired | Potential risk of exposure                                                           | Underlying medical conditions or risk factors | Outcome  | Reference                         |
|------|--------------|-------------------|--------------------------|--------------------------------------------------------------------------------------|--------------------------------------------------|--------------------------------------------------------------------------------------|-----------------------------------------------|----------|-----------------------------------|
| 51   | 82 YO male   | 2004              | United States            | Singapore, Malaysia, Burma, or Thailand                                              | Singapore, Malaysia, Burma, or Thailand          | Unknown risk in Singapore, Malaysia, Burma, or Thailand                              | Diabetes and chronic renal disease            | Survived | 34                                |
| 52   | 48 YO male   | 2005              | United States            | Honduras                                                                             | Honduras                                         | Unknown risk in Honduras                                                             | Diabetes                                      | Survived | 35                                |
| 53   | 17 YO female | 2005              | Brazil                   | Resident of Brazil with no travel history outside Brazil                             | Brazil                                           | Unknown risk in Brazil                                                               | Diabetes and cystic fibrosis                  | Survived | 36                                |
| 54   | 80 YO female | 2005              | United States            | Resident of Honduras with travel history to the United States                        | Honduras                                         | Unknown risk in Honduras                                                             | NR                                            | Died     | 35                                |
| 55   | 30 YO male   | 2005              | Brazil                   | Resident of Brazil with no travel history outside Brazil                             | Brazil                                           | Car accident resulted in immersion in a river                                        | Cranio-encephalic trauma                      | Died     | 26,29                             |
| 56   | 28 YO male   | 2005              | Spain                    | Resident of Spain with travel history to Colombia                                    | Colombia                                         | Environmental: patient became ill after a 4-week trip through the jungle of Colombia | None                                          | Survived | 37                                |
| 57   | 52 YO male   | 2005              | Colombia                 | Resident of Colombia with no reported travel history                                 | Colombia                                         | Unknown risk in Colombia: patient was a driver                                       | Diabetes                                      | Survived | 23                                |
| 58   | 17 YO male   | 2006              | United States and Canada | British Virgin Islands and Canada                                                    | British Virgin Islands                           | Unknown risk in the British Virgin Islands                                           | None                                          | Survived | 38                                |
| 59   | 17 YO male   | 2008              | Brazil                   | Resident of Brazil with no travel history outside Brazil                             | Brazil                                           | Possible risk of exposure included swimming in recreational river/waterfall          | Sickle-cell anemia                            | Died     | 29,39, unpublished data from SESA |
| 60   | 32 YO male   | 2008              | United States            | No travel history outside the United States                                          | United States (mainland)                         | Unknown risk in the United States                                                    | Diabetes                                      | Survived | 40                                |
| 61   | 22 YO male   | 2008              | Colombia                 | Resident of Colombia                                                                 | Colombia                                         | Unknown risk in Colombia                                                             | None                                          | Survived | 41                                |
| 62   | 69 YO male   | 2008              | Brazil                   | Resident of Brazil with no travel history outside Brazil                             | Brazil                                           | Agriculture: patient was a farmer                                                    | NR                                            | Died     | 42                                |
| 63   | 17 YO male   | 2009              | Argentina                | Resident of the Dominican Republic with travel history to Argentina for medical care | Dominican Republic                               | Unknown risk in the Dominican Republic                                               | Hodgkin's lymphoma                            | Survived | 43                                |
| 64   | 7 YO female  | 2009              | United States            | Puerto Rico, Portugal, Aruba, and Australia                                          | Aruba                                            | Unknown                                                                              | None                                          | Survived | 44                                |
| 65   | 88 YO male   | 2009              | United States            | Puerto Rican veteran with service in Korea and Panama                                | United States (Puerto Rico)                      | Environmental: digging ditch                                                         | None                                          | Survived | Unpublished data from CDC         |
| 66   | 44 YO female | 2009              | United Kingdom           | Caribbean woman with travel history to Jamaica and Thailand                          | Thailand                                         | Unknown risk in Thailand                                                             | Diabetes                                      | Survived | 45                                |
| 67   | 48 YO male   | 2009              | Brazil                   | Resident of Brazil with no travel history outside Brazil                             | Brazil                                           | Farmer with potential environmental exposure to soil and water                       | Diabetes, obesity                             | Survived | 29, unpublished data from SESA    |
| 68   | 30 YO male   | 2010              | United States            | Resident of Mexico                                                                   | Mexico                                           | Unknown                                                                              | Unknown                                       | Died     | Unpublished data from CDC         |

(continued)

SUPPLEMENTAL APPENDIX 1  
Continued

| Case | Patient      | Year of diagnosis | Country of diagnosis        | Travel history including prior residence, vacation, or country of birth   | Country where infection was most likely acquired | Potential risk of exposure                                                                                                                           | Underlying medical conditions or risk factors | Outcome  | Reference                                  |
|------|--------------|-------------------|-----------------------------|---------------------------------------------------------------------------|--------------------------------------------------|------------------------------------------------------------------------------------------------------------------------------------------------------|-----------------------------------------------|----------|--------------------------------------------|
| 69   | 47 YO male   | 2010              | Brazil                      | Resident of Brazil with no travel history outside Brazil                  | Brazil                                           | Possible risk of recreational exposure, included water drops                                                                                         | Sickle-cell anemia                            | Survived | <sup>29</sup>                              |
| 70   | 28 YO male   | 2010              | Brazil                      | Resident of Brazil with no travel history outside Brazil                  | Brazil                                           | Trucker who transported soil                                                                                                                         | Dengue fever                                  | Died     | <sup>46</sup>                              |
| 71   | 29 YO male   | 2010              | Brazil                      | Resident of Brazil with no travel history outside Brazil                  | Brazil                                           | Occupational exposure to soil and water                                                                                                              | None                                          | Died     | Unpublished data from SESA                 |
| 72   | 56 YO male   | 2010              | Brazil                      | Resident of Brazil with no travel history outside Brazil                  | Brazil                                           | Patient was a paraplegic who crawled on the ground                                                                                                   | Diabetes                                      | Survived | <sup>29</sup> , unpublished data from SESA |
| 73   | 38 YO male   | 2010              | United States (Puerto Rico) | Resident of Puerto Rico with no travel history outside Puerto Rico        | United States (Puerto Rico)                      | Contact with soil in Puerto Rico; patient is a landscaper                                                                                            | None                                          | Died     | <sup>47</sup>                              |
| 74   | 15 YO female | 2010              | France                      | Resident of France with travel history to Guadeloupe                      | Guadeloupe                                       | Unknown in Guadeloupe                                                                                                                                | NR                                            | Survived | <sup>48</sup>                              |
| 75   | 35 YO male   | 2010              | Switzerland                 | Resident of Switzerland with travel history to Martinique                 | Martinique                                       | Surfing and hiking while on vacation in Martinique. The ground was muddy. Patient also had multiple abrasions on lower limbs                         | None                                          | Died     | <sup>22,49,50</sup>                        |
| 76   | 27 YO female | 2010              | United States               | England, Italy, and Greece                                                | United States (mainland)                         | Possible contact with reptiles in the United States; patient worked in a zoological warehouse                                                        | None                                          | Survived | Unpublished data from CDC                  |
| 77   | 42 YO female | 2010              | United States               | Costa Rica and Mexico                                                     | Costa Rica                                       | Contact with soil and water while vacationing in Costa Rica. Patient also reported getting cut on left groin by a boat propeller while in Costa Rica | None                                          | Survived | Unpublished data from CDC                  |
| 78   | 67 YO female | 2010              | United States               | Born in Laos with travel history to Cambodia                              | Laos or Cambodia                                 | Unknown                                                                                                                                              | Diabetes                                      | Survived | Unpublished data from CDC                  |
| 79   | 46 YO female | 2010              | United States               | Born in the United Kingdom with travel history to Aruba and the Caribbean | Aruba or other Caribbean countries               | Unknown                                                                                                                                              | Unknown                                       | Survived | <sup>51</sup>                              |
| 80   | 82 YO male   | 2011              | United States               | The Philippines                                                           | The Philippines                                  | Unknown risk in the Philippines                                                                                                                      | Unknown                                       | Survived | Unpublished data from CDC                  |
| 81   | 58 YO male   | 2011              | United States               | Cambodia                                                                  | Cambodia                                         | Unknown risk in Cambodia                                                                                                                             | Unknown                                       | Survived | Unpublished data from CDC                  |
| 82   | 35 YO male   | 2011              | United States               | Malaysia                                                                  | Malaysia                                         | Contact with soil in Malaysia                                                                                                                        | Unknown                                       | Survived | Unpublished data from CDC                  |
| 83   | 69 YO male   | 2011              | United States               | Cambodia                                                                  | Cambodia                                         | Unknown risk in Cambodia                                                                                                                             | Diabetes and chronic kidney disease           | Survived | Unpublished data from CDC                  |
| 84   | 75 YO male   | 2011              | United States               | The Philippines                                                           | The Philippines                                  | Unknown risk in the Philippines                                                                                                                      | Alcoholism and renal disease                  | Died     | Unpublished data from CDC                  |

(continued)

SUPPLEMENTAL APPENDIX 1  
Continued

| Case | Patient      | Year of diagnosis | Country of diagnosis | Travel history including prior residence, vacation, or country of birth | Country where infection was most likely acquired | Potential risk of exposure                                                       | Underlying medical conditions or risk factors | Outcome  | Reference                  |
|------|--------------|-------------------|----------------------|-------------------------------------------------------------------------|--------------------------------------------------|----------------------------------------------------------------------------------|-----------------------------------------------|----------|----------------------------|
| 85   | 22 YO male   | 2011              | United States        | Mexico                                                                  | Mexico                                           | Unknown risk in Mexico                                                           | Alcoholism                                    | Survived | Unpublished data from CDC  |
| 86   | 10 YO female | 2011              | United States        | Mexico                                                                  | Mexico                                           | Unknown risk in Mexico                                                           | None                                          | Survived | Unpublished data from CDC  |
| 87   | 53 YO male   | 2011              | Brazil               | None                                                                    | Brazil                                           | Occupational exposure to soil                                                    | Alcoholism, chronic renal failure             | Survived | Unpublished data from SESA |
| 88   | 3 YO male    | 2011              | Brazil               | Resident of Brazil with no travel history outside Brazil                | Brazil                                           | Contact with soil                                                                | None                                          | Died     | Unpublished data from SESA |
| 89†  | 56 YO male   | 2011              | Brazil               | Resident of Brazil with no travel history outside Brazil                | Brazil                                           | Occupational exposure to soil. Patient was an agriculturist                      | HIV                                           | Died     | Unpublished data from SESA |
| 90†  | 7 YO male    | 2011              | Brazil               | Resident of Brazil with no travel history outside Brazil                | Brazil                                           | Possible risk of recreational exposure included waterfall drops                  | None                                          | Survived | Unpublished data from SESA |
| 91   | 29 YO male   | 2011              | Brazil               | Resident of Brazil with no travel history outside Brazil                | Brazil                                           | Brick maker (potter), agriculturist                                              | Immunodeficiency                              | Survived | Unpublished data from SESA |
| 92   | 31 YO male   | 2012              | Colombia             | Resident of Colombia with no reported travel history                    | Colombia                                         | Unknown risk in Colombia. Patient was also a prisoner                            | HIV                                           | Survived | <sup>23</sup>              |
| 93   | 21 YO male   | 2012              | Brazil               | Resident of Brazil with no travel history outside Brazil                | Brazil                                           | Car accident resulted in immersion in a river                                    | Cranio-encephalic trauma                      | Died     | Unpublished data from SESA |
| 94   | 82 YO female | 2012              | Brazil               | Resident of Brazil with no travel history outside Brazil                | Brazil                                           | Gardener                                                                         | Diabetes, chronic renal failure               | Died     | Unpublished data from SESA |
| 95   | 49 YO male   | 2012              | United States        | Born in Bangladesh with travel history to Saudi Arabia                  | Saudi Arabia or Bangladesh                       | Contact with mud during rainy season in Bangladesh                               | Diabetes                                      | Survived | <sup>52</sup>              |
| 96   | 10 YO male   | 2012              | United States        | Asian born with travel history to Vietnam                               | Vietnam                                          | Unknown risk in Vietnam                                                          | None                                          | Survived | Unpublished data from CDC  |
| 97   | 56 YO male   | 2012              | United States        | Born in Scotland with travel history to Thailand                        | Thailand                                         | Contact with soil, animals, and water in Thailand; patient is a product engineer | Diabetes                                      | Survived | Unpublished data from CDC  |
| 98   | 56 YO female | 2012              | United States        | India                                                                   | India                                            | Contact with soil in India                                                       | Diabetes                                      | Survived | Unpublished data from CDC  |
| 99   | 47 YO male   | 2012              | United States        | Vietnam                                                                 | Vietnam                                          | Unknown risk in Vietnam                                                          | None                                          | Survived | Unpublished data from CDC  |
| 100  | 58 YO male   | 2012              | United States        | U.S. resident, born in Trinidad with recent travel history to Trinidad  | Trinidad                                         | Unknown risk in Trinidad                                                         | Pancreatic cancer                             | Died     | Unpublished data from CDC  |
| 101  | 60 YO male   | 2012              | United States        | Resident of Puerto Rico                                                 | United States (Puerto Rico)                      | Contact with soil in Puerto Rico; patient works in a banana farm                 | Diabetes                                      | Survived | <sup>47</sup>              |
| 102  | 71 YO male   | 2012              | United States        | Guatemala                                                               | Guatemala                                        | Unknown risk in Guatemala                                                        | Diabetes                                      | Survived | Unpublished data from CDC  |
| 103  | 61 YO male   | 2012              | United States        | China and Burma                                                         | China                                            | Unknown risk in China                                                            | Diabetes                                      | Survived | Unpublished data from CDC  |
| 104  | 37 YO male   | 2012              | United States        | U.S. born resident with frequent travel to Vietnam                      | Vietnam                                          | Unknown risk in Vietnam                                                          | None                                          | Survived | Unpublished data from CDC  |

(continued)

SUPPLEMENTAL APPENDIX 1  
Continued

| Case | Patient      | Year of diagnosis | Country of diagnosis | Travel history, including prior residence, vacation, or country of birth                                                   | Country where infection was most likely acquired   | Potential risk of exposure                                                                                                       | Underlying medical conditions or risk factors                                                    | Outcome  | Reference                  |
|------|--------------|-------------------|----------------------|----------------------------------------------------------------------------------------------------------------------------|----------------------------------------------------|----------------------------------------------------------------------------------------------------------------------------------|--------------------------------------------------------------------------------------------------|----------|----------------------------|
| 105  | 68 YO male   | 2013              | Brazil               | Resident of Brazil with no travel history outside Brazil                                                                   | Brazil                                             | Unknown                                                                                                                          | Congestive heart failure                                                                         | Died     | Unpublished data from SESA |
| 106  | 66 YO male   | 2013              | United States        | U.S. born soldier with services and/or travel history to Mexico, Vietnam, SE and central Asia, Iraq, or Afghanistan        | Vietnam, SE and central Asia, Iraq, or Afghanistan | Patient has had extensive exposures with wet environments in Vietnam, SE and central Asia, Iraq, and Afghanistan                 | Diabetes                                                                                         | Survived | Unpublished data from CDC  |
| 107  | 46 YO male   | 2013              | United States        | Russian born, travel history to China, Singapore, Japan, Korea, Malaysia, and Australia                                    | Malaysia                                           | Unknown risk                                                                                                                     | None                                                                                             | Survived | Unpublished data from CDC  |
| 108  | 44 YO male   | 2013              | United States        | No travel history outside the United States                                                                                | United States (mainland)                           | Unknown                                                                                                                          | Diabetes                                                                                         | Died     | <sup>53</sup>              |
| 109  | 81 YO male   | 2013              | United States        | India                                                                                                                      | India                                              | Unknown risk in India                                                                                                            | None                                                                                             | Survived | Unpublished data from CDC  |
| 110  | 22 YO female | 2013              | United States        | Guatemala                                                                                                                  | Guatemala                                          | Use of thermal sulfur hot spring in Guatemala                                                                                    | None                                                                                             | Survived | Unpublished data from CDC  |
| 111  | 70 YO male   | 2013              | United States        | Patient was born in Laos and entered the United States through a refugee camp from Thailand                                | Laos or Thailand                                   | Unknown risk in Laos or Thailand                                                                                                 | None                                                                                             | Survived | Unpublished data from CDC  |
| 112  | 65 YO male   | 2013              | United States        | Thailand                                                                                                                   | Thailand                                           | Contact with soil and water while in Thailand. Patient also went hiking near a waterfall                                         | None                                                                                             | Survived | Unpublished data from CDC  |
| 113  | 70 YO male   | 2013              | United States        | Korea, Japan, Vietnam, Laos, Africa, and Egypt                                                                             | Africa                                             | Unknown risk in Africa                                                                                                           | Diabetes and chronic lung disease                                                                | Survived | Unpublished data from CDC  |
| 114  | 36 YO male   | 2013              | Colombia             | Resident of Colombia with no reported travel history                                                                       | Colombia                                           | Patient worked as a banana farmer                                                                                                | 6-year history of muscle and general weakness, dyspnea, night sweats, chills, fatigue, and cough | Survived | <sup>54,55</sup>           |
| 115  | 17 YO male   | 2014              | Canada               | Patient was born in Jamaica, moved to Canada at the age of 4 years and had travel history to England, Trinidad and Tobago. | Trinidad and Tobago                                | Possible contact with soil and/or water in Trinidad; patient visited family members in Trinidad for 2 months during rainy season | Polymorphic ventricular tachycardia and electrical storm                                         | Survived | <sup>56</sup>              |
| 116  | 57 YO male   | 2014              | Brazil               | Resident of Brazil with no travel history outside Brazil                                                                   | Brazil                                             | Unknown risk in Brazil                                                                                                           | Leukemia                                                                                         | Died     | Unpublished data from SESA |
| 117  | 42 YO male   | 2014              | Brazil               | Resident of Brazil with no travel history outside Brazil                                                                   | Brazil                                             | Occupational exposure to soil and water                                                                                          | Diabetes                                                                                         | Survived | Unpublished data from SESA |
| 118  | 57 YO male   | 2014              | Brazil               | Resident of Brazil with no travel history outside Brazil                                                                   | Brazil                                             | Occupational exposure to soil and water                                                                                          | Leukemia and alcoholism                                                                          | Survived | Unpublished data from SESA |
| 119  | 50 YO male   | 2014              | Brazil               | Resident of Brazil with no travel history outside Brazil                                                                   | Brazil                                             | Occupational exposure to soil and water                                                                                          | Diabetes and alcoholism                                                                          | Died     | Unpublished data from SESA |
| 120  | 42 YO male   | 2015              | Brazil               | Resident of Brazil with no travel history outside Brazil                                                                   | Brazil                                             | Recreational exposure to soil and water                                                                                          | Diabetes                                                                                         | Survived | Unpublished data from SESA |

CDC = Centers for Disease Control and Prevention; HIV = human immunodeficiency virus; NR = not reported; SE = southeast; SESA = Secretaria da Saúde do Estado do Ceará, which is the Health Secretary of Ceará State in Brazil; YO = years old.

\*Patients, nos. 37–40, were siblings.

†Cases, nos. 82 and 83, were suspected cases with positive polymerase chain reaction.



## SUPPLEMENTAL REFERENCES

- McDowell F, Varney PL, 1947. Melioidosis: report of first case from the Western Hemisphere. *JAMA* 134: 361–362.
- Beamer PR, Varney PL, Brown WG, McDowell F, Eck B, 1948. Melioidosis. Report of a second case from the Western Hemisphere, with bacteriological studies on both cases. *Am J Pathol* 24: 717–718.
- Beamer PR, Varney PL, Brown WG, McDowell F, 1954. Studies on *Malleomyces pseudomallei* isolated from melioidosis originating in the Western Hemisphere. *Am J Clin Pathol* 24: 1231–1240.
- Garry MW, Koch ML, 1951. Chronic melioidosis: bacteriological and clinical correlation in diagnosis. *J Lab Clin Med* 58: 374–383.
- Prevatt AL, Hunt JS, 1957. Chronic systemic melioidosis; review of literature and report of a case, with a note on visual disturbance due to chloramphenicol. *Am J Med* 23: 810–823.
- Joy RT, Scalettar R, Sodee DB, 1960. Optic and peripheral neuritis: probable effect of prolonged chloramphenicol therapy. *JAMA* 173: 1731–1734.
- Biegeleisen JZ Jr, Mosquera R, Cherry WB, 1964. A case of human melioidosis: clinical, epidemiological and laboratory findings. *Am J Trop Med Hyg* 13: 89–99.
- Osteraas GR, Hardman JM, Bass JW, Wilson C, 1971. Neonatal melioidosis. *Am J Dis Child* 122: 446–448.
- McCormick JB, Sexton DJ, McMurray JG, Carey E, Hayes P, Feldman RA, 1975. Human-to-human transmission of *Pseudomonas pseudomallei*. *Ann Intern Med* 83: 512–513.
- Centers for Disease Control and Prevention (CDC), 1977. Melioidosis—Pennsylvania. *MMWR* 25: 419–420.
- Brill DR, Shoop JD, 1977. Sensitivity of radionuclide isotope brain scan in cerebral melioidosis: case report. *J Nucl Med* 18: 987–989.
- Schlech WF 3rd, Turchik JB, Westlake RE Jr, Klein GC, Band JD, Weaver RE, 1981. Laboratory-acquired infection with *Pseudomonas pseudomallei* (melioidosis). *N Engl J Med* 305: 1133–1135.
- Bloch M, Soundy J, Guzman A, 1981. Infections from *Pseudomonas* other than *aeruginosa*. *Rev Inst Investig Med (El Salvador)* 10: 164–189.
- Christenson-Bravo B, Rodriguez JE, Vázquez G, Ramirez CH, 1986. *Pseudomonas pseudomallei* (melioidosis): acute septicemia and meningitis in patient with systemic lupus erythematosus. *Bol Asoc Med P R* 78: 347–349.
- Barnes PF, Appleman MD, Cosgrove MM, 1986. A case of melioidosis originating in North America. *Am Rev Respir Dis* 134: 170–171.
- Olive C, Loetitia G, Desbois N, Roche B, Jouannelle J, Dodin A, 1995. Forme septicopyohémique de melioidose humaine: un premier cas aux Antilles Françaises. *Presse Med* 24: 1270.
- Théodose R, Olive C, Dubreuil F, Dupont-Fontanille J, Jean-Baptiste G, Jouannelle J, 2000. A propos des trois premiers cas en Martinique d'infection a *Burkholderia pseudomallei*. *Rev Med Interne* 21: 592.
- Redondo MC, Gómez M, Landaeta ME, Ríos H, Khalil R, Guevara RN, Palavecino S, Figuera M, Caldera J, Rivera R, Calvo A, Vitelli J, Morón M, Nuñez MJ, 2011. Melioidosis presenting as sepsis syndrome: a case report. *Int J Infect Dis* 15: E217–E218.
- Dorman SE, Gill VJ, Gallin JI, Holland SM, 1998. *Burkholderia pseudomallei* infection in a Puerto Rican patient with chronic granulomatous disease: case report and review of occurrences in the Americas. *Clin Infect Dis* 26: 889–894.
- Renella R, Perez JM, Chollet-Martin S, Sarnacki S, Fischer A, Blanche S, Casanova JL, Picard C, 2006. *Burkholderia pseudomallei* infection in chronic granulomatous disease. *Eur J Pediatr* 165: 175–177.
- Perez JM, Petiot A, Adjide C, Gerry F, Goursaud R, Juminer B, 1997. First case report of melioidosis in Guadeloupe, a French West Indies archipelago. *Clin Infect Dis* 25: 164–165.
- Ledrans M, Cassadou S, 2011. Mélioidose: une pathologie émergente aux Antilles? *BVS I*: 14–15.
- Montufar FE, Ochoa JE, Ortega H, Franco L, Montufar MC, Monsalve A, Jaramillo C, Zapata M, 2015. Melioidosis in Antioquia, Colombia. An emerging or endemic disease: a cases series. *Int J Infect Dis* 37: 50–57.
- Messimo Julio A, Villegas Villareal I, 2000. Melioidosis en Costa Rica: reporte del primer caso. *Acta Med Costarric* 42: 131–133.
- Schindler N, Calligaro KD, Dougherty MJ, Diehl J, Modi KH, Braffman MN, 2002. Melioidosis presenting as an infected intrathoracic subclavian artery pseudoaneurysm treated with femoral vein interposition graft. *J Vasc Surg* 35: 569–572.
- Inglis TJ, Rolim DB, Sousa AQ, 2006. Melioidosis in the Americas. *Am J Trop Med Hyg* 75: 947–954.
- Rolim DB, Vilar DC, Sousa AQ, Miralles IS, de Oliveira DC, Harnett G, O'Reilly L, Howard K, Sampson I, Inglis TJJ, 2005. Melioidosis, northeastern Brazil. *Emerg Infect Dis* 11: 1458–1460.
- Miralles IS, Maciel MC, Angelo MR, Gondini MM, Frota LH, dos Reis CM, Hofer E, 2004. *Burkholderia pseudomallei*: a case report of a human infection in Ceará, Brazil. *Rev Inst Med Trop Sao Paulo* 46: 51–54.
- Brilhante RS, Bandeira TJ, Cordeiro RA, Grangeiro TB, Lima RA, Ribeiro JF, Castelo-Branco DS, Rodrigues JL, Coelho IC, Magalhães FG, Rocha MF, Sidrim JJ, 2012. Clinical-epidemiological features of 13 cases of melioidosis in Brazil. *J Clin Microbiol* 50: 3349–3352.
- Braga MD, Almeida PR, 2005. Primeira descrição de um caso autopsiado de melioidose no Estado do Ceará. *Rev Soc Bras Med Trop* 38: 58–60.
- Christenson B, Fuxench Z, Morales JA, Suarez-Villamil RA, Souchet LM, 2003. Severe community-acquired pneumonia and sepsis caused by *Burkholderia pseudomallei* associated with flooding in Puerto Rico. *Bol Asoc Med P R* 95: 17–20.
- Currie BJ, Inglis TJ, Vannier AM, Novak-Weekley SM, Ruskin J, Mascola L, Bancroft E, Borenstein L, Harvey S, Rosenstein N, Clark TA, Nguyen DM, 2004. Laboratory exposure to *Burkholderia pseudomallei*—Los Angeles, California, 2003. *MMWR* 53: 988–990.
- Aardema H, Luijnenburg EM, Salm EF, Bijlmer HA, Visser CE, Van't Wout JW, 2005. Changing epidemiology of melioidosis? A case of pulmonary melioidosis with fatal outcome imported from Brazil. *Epidemiol Infect* 133: 871–875.
- Ngauy V, Lemeshev Y, Sadowski L, Crawford G, 2005. Cutaneous melioidosis in a man who was taken as a prisoner of war by the Japanese during World War II. *J Clin Microbiol* 43: 970–972.
- Kite-Powell A, Livengood JR, Suarez J, Hopkins R, Clark TA, Chertow D, 2006. Imported melioidosis—South Florida. *MMWR* 55: 874–876.
- Barth AL, Silva FA, Hoffmann A, Vieira MI, Zavascki AP, Ferreira AG, da Cunha LG Jr, Albano RM, de Andrade Marques E, 2007. Cystic fibrosis patient with *Burkholderia pseudomallei* infection acquired in Brazil. *J Clin Microbiol* 45: 4077–4080.
- Guzman-Gomez L, Agudo Bilbao M, Peiro-Callizo E, Salas C, 2015. Melioidosis imported from Colombia to Spain [article in Spanish]. *Enferm Infecc Microbiol Clin* 33: 214–216.
- Corral DM, Coates AL, Yau YC, Tellier R, Glass M, Jones SM, Waters VJ, 2008. *Burkholderia pseudomallei* infection in a cystic fibrosis patient from the Caribbean: a case report. *Can Respir J* 15: 237–239.
- Couto MS, Cordeiro RA, Rocha MF, Grangeiro TB, Leitão NP, Bandeira TJ, Sidrim JJ, Brilhante RS, 2009. A diagnosis of *Burkholderia pseudomallei* directly in a bronchoalveolar lavage by polymerase chain reaction. *Diagn Microbiol Infect Dis* 65: 73–75.
- Stewart T, Engelthaler DM, Blaney DD, Tuanyok A, Wangsness E, Smith TL, Pearson T, Komatsu KK, Keim P, Currie BJ, Levy C, Sunenshine R, 2011. Epidemiology and investigation of melioidosis, southern Arizona. *Emerg Infect Dis* 17: 1286–1288.
- González RG, Mantilla DWA, Rada ER, 2009. Neumonía y osteomielitis por *Burkholderia pseudomallei*: reporte de un caso clínico. *Rev MED* 17: 146–149.
- Sidrim JJ, Rocha MF, Bandeira TJ, Cordeiro RA, Carvalho BM, Grangeiro TB, Holanda MA, Lima RA, Valente LG, Costa AK, Brilhante RS, 2011. Mycotic aneurysm caused by *Burkholderia pseudomallei*: report of a Brazilian strain genetically related to Thai strains. *Clin Microbiol Infect* 17: 719–721.



43. Almuzara M, Barberis C, Bravo M, Pisarevsky A, Petrucci E, Famiglietti A, Lasala M, Vay C, 2011. Un caso de melioidosis en la Argentina. *Medicina (B Aires)* 71: 39–41.
44. O'Sullivan BP, Torres B, Conidi G, Smole S, Gauthier C, Stauffer KE, Glass MB, Gee JE, Blaney D, Smith TL, 2011. *Burkholderia pseudomallei* infection in a child with cystic fibrosis: acquisition in the Western Hemisphere. *Chest* 140: 239–242.
45. Garas G, Ifeacho S, Millard R, Tolley N, 2010. Melioidosis and the vacuum-assisted closure device: a rare cause of a discharging neck wound, and a new approach to management. *J Laryngol Otol* 124: 1021–1024.
46. Macedo RN, Rocha FA, Rolim DB, Vilar DC, Araújo FM, Vieira NN, Teixeira JR, Carvalho MC, Oliveira FG, Cavalcanti LP, 2012. Severe coinfection of melioidosis and dengue fever in northeastern Brazil: first case report. *Rev Soc Bras Med Trop* 45: 132–133.
47. Doker TJ, Sharp TM, Rivera-Garcia B, Perez-Padilla J, Benoit TJ, Ellis EM, Elrod MG, Gee JE, Shieh WJ, Beesley CA, Ryff KR, Traxler RM, Galloway RL, Haberling DL, Waller LA, Shadomy SV, Bower WA, Hoffmaster AR, Walke HT, Blaney DD, 2015. Contact investigation of melioidosis cases reveals regional endemicity in Puerto Rico. *Clin Infect Dis* 60: 243–250.
48. Meckenstock R, Therby A, Marque-Juillet S, Monnier S, Khau D, Pangon B, Greder-Belan A, 2012. Cutaneous melioidosis in adolescent returning from Guadeloupe. *Emerg Infect Dis* 18: 359–360.
49. Abbas M, Emonet S, Schrenzel J, Merlani P, Loutan L, Getaz L, 2011. Melioidose: une pathologie tropicale méconnue. *Rev Med Suisse* 7: 1000–1005.
50. Gétaz L, Abbas M, Loutan L, Schrenzel J, Iten A, Simon F, Decosterd A, Studer R, Sudre P, Michel Y, Merlani P, Emonet S, 2011. Fatal acute melioidosis in a tourist returning from Martinique Island, November 2010. *Euro Surveill* 16: pii 19758.
51. Mickail N, Klein NC, Cunha BA, Schoch PA, 2012. Melioidosis breast abscesses. *J Infect* 64: 434–435.
52. Christini A, King E, 2012. Neck mass in a returning traveler. *JAMA* 308: 2142–2143.
53. Doker TJ, Quinn CL, Salehi ED, Sherwood JJ, Benoit TJ, Glass Elrod M, Gee JE, Shadomy SV, Bower WA, Hoffmaster AR, Walke HT, Blaney DD, DiOrio MS; Melioidosis Investigation Team, 2014. Fatal *Burkholderia pseudomallei* infection initially reported by *Bacillus* species, Ohio. *Am J Trop Med Hyg* 91: 743–746.
54. Arellano CH, Gomez G, Sanjuán OI, 2013. Tos y disnea de seis años de evolución en un adulto joven con melioidosis pulmonar crónica. Reporte de caso. *Medicina Laboratorio* 19: 1–8.
55. Nasner-Posso KM, Cruz-Calderon S, Rodriguez-Morales AJ, Montufar-Andrade FE, 2015. Melioidosis: a sporadic or an emerging disease in Colombia? *Enferm Infecc Microbiol Clin* 33: 206–207.
56. Hogan C, Wilmer A, Badawi M, Hoang L, Chapman M, Press N, Antonation K, Corbett C, Romney M, Murray M, 2015. Melioidosis in Trinidad and Tobago. *Emerg Infect Dis* 21: 902–904.
